# Supplementary material for: Examination of Genetic Control Elements in the Phototrophic Firmicute Heliomicrobium modesticaldum
Source: MDPI journal article supplement (doi:10.3390/microorganisms10050876), 2022-04-22
Supplement: s1 [file s1]

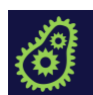

Supplementary materials

**Table S1.** The sequences and annotations of promoters used in this study.

| Promoter           | Sequence                                                                                                                                                                                                                                                                                                                                                                                                                                                                                                                                                                                                                                                                                       | Source             |
|--------------------|------------------------------------------------------------------------------------------------------------------------------------------------------------------------------------------------------------------------------------------------------------------------------------------------------------------------------------------------------------------------------------------------------------------------------------------------------------------------------------------------------------------------------------------------------------------------------------------------------------------------------------------------------------------------------------------------|--------------------|
| cbp_2              | GAGTCGTGACTAAGAACGTCAAAGTAATTAACAATACAGCTATTTTTCTCATGCTTTT<br>ACCCCTTTTCATAAAATTTAATTTTATCGTTATCATAAAAAATTATAGACGTTATATTG<br>CTTGCCGGGATATAGTGCTGGGCATTTCGTTGGTGCAAAATGTTCCGAGTAAGGTGGA<br>TATTGATTTGCATGTTGATCTATTGCATTGAAATGATTAGTTATCCGTAAATATTAATT<br>AATCATATCATAAAATTAATTATATCATAATTGTTTTGACGAATGAAGGTTTTGGATA<br>AATTATCAAGTAAAGGAACGCTAAAAATTTTGGCGTAAAAATATCAAAATGACCACT<br><b>TGAATTAATATGGTAAAGTAGATATAATATTTTGGTAAACATGCCTTCAGCAAGGT</b><br>AGATTAGCTGTTTCCGTATAAATTAACCGTATGGTAAAACGGCAGTCAGAAAAATA<br>AGTCATAAGATTCCGTTATGAAAATATACTTCGGTAGTTAATAATAAGAGATATGAG<br>GTAAGAGATACAAGATAAGAGATATAAGGTACGAATGTATAAGATGGTGCTTTTAG<br>GCACACTAAATAAAAAACAAATAAACGAAAATTTTAAGGAGGACGAAAG | [1]                |
| gapDH              | TAATTACTGTATCTCTCTGGCATTGCCAGGTTTTAATAAAGATTAAAATTATTGACTA<br>GAAATAAAAAAATTGTCCATAATATTAATGGACAAAAAACAAAGAATTACATCA<br>AAGGAAGATAAAAAATACTTTGTTAAAAAATTAATTATTTTTATCTAAACTATTGAA<br>AATGAAAATAAAAAATAATATAAAATGAATCATAGTGCAAGAGATACTTGCCAGAGGA<br>TGAATATTTTACTGCATTTCATGCTTTATGGCAGCTAATAGAGGCATTAAATTAATTT<br>TAATTTACAATAGGAGGCGATATTAATG                                                                                                                                                                                                                                                                                                                                                  | [1]                |
| gapDH/tetO         | TAATTACTGTATCTCTCTGGCATTGCCAactctatcattgatagagTAAAATTATTGACTAGAA<br>ATAAAAAAATTGTCCATAATATTAATGGACAAAAAACAAAGAATTACATCAAAG<br>GAAGATAAAAAATACTTTGTTAAAAAATTAATTATTTTTATCTAAACTATTGAAAactc<br>tatcattgatagagTAAAATGAATCATAGTGCAAGAGATACTTGCCAGAGGATGAATATTTT<br>ACTGCATTTCATGCTTTATGGCAGCTAATAGAGGCATTAAATTAATTTTAATTTACAA<br>TAGGAGGCGATATTAATG                                                                                                                                                                                                                                                                                                                                                | [1],<br>This paper |
| eno                | GGAAATATTA AAAATGGAATGTTGAAAAAATGTTTTAAGATGGGTCAATTATGGATA<br>AAATATACTATGGTTTTGCAATAAATGCTTTCTATTAATTGGACTTTGTGGTAATATG<br>GTAGAAGGATGCAGTGTTAATTTTTTAACATATAAAAAATAAGCTATATGAAGGGAG<br>AATGGAGA                                                                                                                                                                                                                                                                                                                                                                                                                                                                                              | [1]                |
| 0815               | ATAATATATATCCGTATTTTACAATATCCATACGAATATGGATTATTTTATTTTGTAT<br>ATTTTAAACAAAAAATTATTTAACTTTTTCAATGGTGGTATTATATATATTGGTCA<br>CAGTTTCAATGAATC AAAAAATAAAGAGGTGTTAAT                                                                                                                                                                                                                                                                                                                                                                                                                                                                                                                                | [1]                |
| 0966               | TTCTTACTACTCCCTTTGCATCTACAGACAAATTTTTCTCTTTAACTTTTCTTGTAAACC<br>GTATCCGCATACTTTTGTCAATAAGTAATTATAGATTATTATTACCGTCAAATCAAAT<br>AATAAATTTTATATCGCCAATTCTTTGCATCCGCTTTAAAGTCTGTGCTATAATTATA<br>TGGTTAAAAATATCATAAAAAAAT AAAATAAAAGTTAAAAGGAAGTATTTT                                                                                                                                                                                                                                                                                                                                                                                                                                               | [1]                |
| 2638               | GATAAACAAAGGACGGTTCAGGGCTTCTGCTCATCCTACTCTGCATTGTAAAAAGGT<br>AGGATGAATTTTTATTTTAATCTTATTGAAAAAATTTTTGAAAAATCGGTTTTATTA<br>AAAAAAGTGGGTATATTATAATAGTCAATTGATTGGTTAAAAAATTTAAATAAG<br>CAACAGAATAATAACAAAA GTAAGGAGGAATTTGTT                                                                                                                                                                                                                                                                                                                                                                                                                                                                      | [1]                |
| 2926               | AAAATATACAAAGGTTTCTTGTTGTTTTAATACCGTTATGTAAATATAATGTAATATAT<br>ATTTTATAATAATATGTATGAGAGATAGTGTTTTGCTATATTGCTATAAAGAATGAGG<br>AGGGAAGTAG                                                                                                                                                                                                                                                                                                                                                                                                                                                                                                                                                        | [1]                |
| P <sub>xyl</sub> * | TTTGATATTCTCTCTTAAAAATAATATTGTAATACTTTTTACACAAAAATAAAAGGTT<br>ATTTTGCAATTGACAAAGATAATTAATATTTTATTATTAGTTCAaagttagtttaataactaa                                                                                                                                                                                                                                                                                                                                                                                                                                                                                                                                                                  | [2]                |

caaaaATAAAGCAAGTAAATATACCTAAATATAAAAAAATTAGGATAGGAAAA  
CGATAGTTATGAAGTGGCATTCAAGGAGGGAT GCAT

Predicted features are marked as follows: ribosome binding sites are underlined, -35 boxes are bolded, -10 boxes are italicized and bolded, and operators tetO1 (in gapDH 2tetO1) and xylO (in P<sub>xyl</sub>) sequences are in lowercase.

\*P<sub>xyl</sub> contains two sets of -35/-10/RBS. The first RBS, -10, and -35 sequences are for the transcription of the *xylR* gene downstream of this set. The second RBS, -10, and -35 sequences are for the gene of interest, i.e., the gene whose transcription will be controlled by the promoter.

**Table S2.** List of primers used in this study. All primers were ordered from IDT.

| Oligonucleotide   | Sequence (5' - 3')                                 | Purpose                                                                                                      |
|-------------------|----------------------------------------------------|--------------------------------------------------------------------------------------------------------------|
| adhB BglIII for   | TAATCGAGATCTATGAAAGGTTTTGCAATGC                    | Amplification of <i>adhB</i> *                                                                               |
| adhB SalI rev     | TAATCGGTGCGACTTATGCTAATATTACAACAGGTTTG             |                                                                                                              |
| Bgl BglII for     | TAATCGAGATCTATGAATGTGTTATCCTCAATTTG                | Amplification of <i>lacZ</i> *                                                                               |
| Bgl SalI rev      | TAATCGGTGCGACCTAAACCTTCCCGGCTTC                    |                                                                                                              |
| PgapDH PspOMI for | TAATACGGGCCCTAATTACTGTATCTCTCTGGC                  | Amplification of P <sub>gapDH</sub> *                                                                        |
| PgapDH BamHI rev  | TAATACGGATCCTAATATCGCCTCCTATTGTAAATTTAA            |                                                                                                              |
| P2638 PspOMI for  | TAATCGGGGCCCCGATAAAACAAAGGACGGTTC                  | Amplification of P <sub>2638</sub> *                                                                         |
| P2638 BamHI rev   | TAATCGGGATCCAACAAATTCCTCCTTACTTTTG                 |                                                                                                              |
| P2926 PspOMI for  | TAATCGGGGCCCCAAAATATACAAAGGTTTCTTGTG               | Amplification of P <sub>2926</sub> *                                                                         |
| P2926 BamHI rev   | ATAATCGGATCCAAAATATACAAAGGTTTCTTGTG                |                                                                                                              |
| Pcbp_2 PspOMI for | TAATCGGGGCCCCGAGTCGTGACTAAGAACG                    | Amplification of P <sub>cbp_2</sub> *                                                                        |
| Pcbp_2 BamHI rev  | TAATCGGGATCCCTTTCGTCTCCTTAAATTTTC                  |                                                                                                              |
| Peno PspOMI for   | TAATCGGGGCCCCGAAATATTTAAATGGAATGTTG                | Amplification of P <sub>eno</sub> *                                                                          |
| Peno BamHI rev    | TAATCGGGATCCTCTCCATTCTCCCTTCATATAG                 |                                                                                                              |
| P0966 PspOMI for  | TAATCGGGGCCCTTCTTACTACTCCCTTTGCG                   | Amplification of P <sub>0966</sub> *                                                                         |
| P0966 BamHI rev   | TAATCGGGATCCAAAATCAGTTCCTTTTAACTTTTATT             |                                                                                                              |
| P0815 PspOMI for  | TAATCGGGGCCCCATAATATATATCCGTATTTTACAATATCC         | Amplification of P <sub>0815</sub> *                                                                         |
| P0815 BamHI rev   | TAATCGGGATCCATTAAACACCTCTTTATTTTTTGATTC            |                                                                                                              |
| PgapDH BamHI for  | AATCAGGATCCGGCCCTAATTACTGTATCTCTCTG                | Amplification of gapDH-lacZ module to add to pUC19                                                           |
| PgapDH BglII for  | AATCAAGATCTGGCCCTAATTACTGTATCTCTCTGGC              | Amplification of P <sub>gapDH/tetO-lacZ</sub> module to add to pMTL86251 downstream of P <sub>eno-tetR</sub> |
| TetO1_1 for       | CTATTGAAAACCTCTATCATTGATAGAGTAAATGAATC-ATAGTGC     | Add <i>tetO1</i> to region between 2nd -35 and -10 in P <sub>gapDH</sub>                                     |
| TetO1_1 rev       | ACTCTATCAATGATAGAGTTTTCAATAGTTTAGATAAAAAAT         |                                                                                                              |
| TetO1_2 for       | TCCCTATCAGTGATAGATAAAATTATTGACTAGAAATAAAAAAATTGTCC | Add <i>tetO1</i> to region between 1st -35 and -10 in P <sub>gapDH</sub>                                     |
| TetO1_2 rev       | TCAATAATTTTACTCTATCAATGATAGAGTTGGCAATGCCAGAGAGATAC |                                                                                                              |
| Eno rev EcoRI     | ATTCGAATTCTCTCCATTCTCCCTTCATATAG                   | Amplification of P <sub>eno</sub> to clone in front of <i>tetR</i>                                           |
| Eno for BamHI     | ATAATCGGATCCGAAATATTTAAATGGAATGTTGAA               |                                                                                                              |
| tetR for EcoRI    | ATCTGAATTCATGTCTAGATTAGATAAAAGTAAAGTG              | Amplification of <i>tetR</i> from <i>E. coli</i> to clone behind P <sub>eno</sub>                            |
| tetR rev PspOMI   | ATTITGGGCCCAACTCGACATCTTGGTTAC                     |                                                                                                              |

\*Products were amplified from the appropriate pDGO plasmids [1] (Table S3).

**Table S3.** List of plasmids. All plasmids (with the exception of pDGO based plasmids) use pMTL86251 as the backbone.

| Plasmid   | Description                                                                                   | Source                     |
|-----------|-----------------------------------------------------------------------------------------------|----------------------------|
| pMTL86251 | Modular shuttle vector for use in clostridial bacteria                                        | [3]                        |
| pAL58     | Plasmid containing adhB reporter gene driven by gapDH promoter                                | This paper                 |
| pAL61     | Plasmid containing adhB reporter gene driven by 2926 promoter                                 | This paper                 |
| pAL2B     | Plasmid containing lacZ reporter gene driven by eno promoter                                  | This paper                 |
| pAL60     | Plasmid containing lacZ reporter gene driven by 2638 promoter                                 | This paper                 |
| pAL62     | Plasmid containing lacZ reporter gene driven by 2926 promoter                                 | This paper                 |
| pAL64     | Plasmid containing lacZ reporter gene driven by cbp_2 promoter                                | This paper                 |
| pAL66     | Plasmid containing lacZ reporter gene driven by gapDH promoter                                | This paper                 |
| pAL731    | Plasmid containing lacZ reporter gene driven by 0966 promoter                                 | This paper                 |
| pAL751    | Plasmid containing lacZ reporter gene driven by 0815 promoter                                 | This paper                 |
| pAL88     | Plasmid containing lacZ reporter gene driven by P <sub>gapDH/tetO</sub>                       | This paper                 |
| pAL111    | Plasmid containing lacZ driven by P <sub>gapDH/tetO</sub> and tetR driven by P <sub>eno</sub> | This paper                 |
| pAL112    | Plasmid containing lacZ driven by P <sub>gapDH</sub> and tetR driven by P <sub>eno</sub>      | This paper                 |
| pALX3     | Plasmid containing lacZ driven by P <sub>xyl</sub> promoter and xylR repressor gene           | This paper                 |
| pDGO89    | Plasmid containing adhB reporter gene driven by 0815 promoter                                 | Gift from Dan Olson<br>[1] |
| pDGO95    | Plasmid containing lacZ reporter gene driven by gapDH promoter                                | Gift from Dan Olson<br>[1] |
| pDGO102   | Plasmid containing lacZ reporter gene driven by eno promoter                                  | Gift from Dan Olson<br>[1] |
| pDGO105   | Plasmid containing lacZ reporter gene driven by 0966 promoter                                 | Gift from Dan Olson<br>[1] |
| pDGO106   | Plasmid containing lacZ reporter gene driven by 2638 promoter                                 | Gift from Dan Olson<br>[1] |
| pDGO108   | Plasmid containing lacZ reporter gene driven by 2926 promoter                                 | Gift from Dan Olson<br>[1] |
| pDGO117   | Plasmid containing lacZ reporter gene driven by cbp_2 promoter                                | Gift from Dan Olson<br>[1] |

**Table S4.** Plasmids constructed for this study with promoter activity determined in *H. modesticaldum* and *E. coli*.

| Plasmid | Promoter | Reporter gene | Detected activity in <i>H. modesticaldum</i> (U/mg protein) | Detected activity in <i>E. coli</i> (U/mg protein) |
|---------|----------|---------------|-------------------------------------------------------------|----------------------------------------------------|
| pAL2B   | eno      | <i>lacZ</i>   | 0.60 ± 0.019                                                | 0.17 ± 0.0050                                      |
| pAL60   | 2638     | <i>lacZ</i>   | 0.067 ± 0.0042                                              | 0.037 ± 0.0028                                     |
| pAL62   | 2926     | <i>lacZ</i>   | 0.39 ± 0.011                                                | 0.39 ± 0.011                                       |
| pAL64   | cbp_2    | <i>lacZ</i>   | 0.64 ± 0.014                                                | 0.39 ± 0.011                                       |
| pAL66   | gapDH    | <i>lacZ</i>   | 0.79 ± 0.027                                                | 0.25 ± 0.0069                                      |
| pAL731  | 0966     | <i>lacZ</i>   | 0.11 ± 0.0044                                               | 0.11 ± 0.0045                                      |
| pAL751  | 0815     | <i>lacZ</i>   | 0.10 ± 0.0044                                               | 0.013 ± 0.00077                                    |

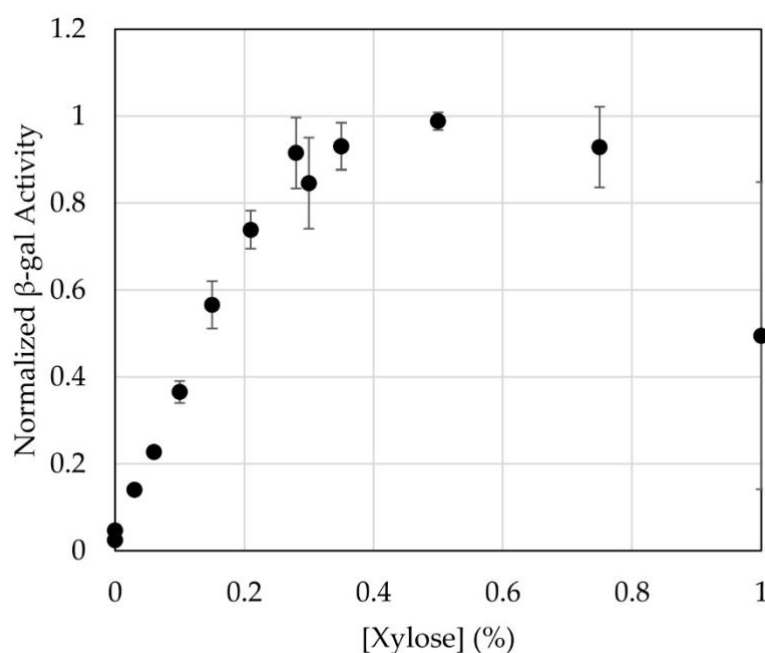

**Figure S1.** The normalized  $\beta$ -gal activity in *H. modesticaldum*. The activity of  $\beta$ -gal in *H. modesticaldum* transformed with pALX3 and grown with xylose at the indicated concentrations, normalized to the maximal activity obtained. The activity assays were performed on two separate days; therefore, data sets for each biological triplicate were scaled according to the activity at 0.35% and then normalized to the maximum activity. Points represent the average of normalizations, and error bars represent standard deviation.

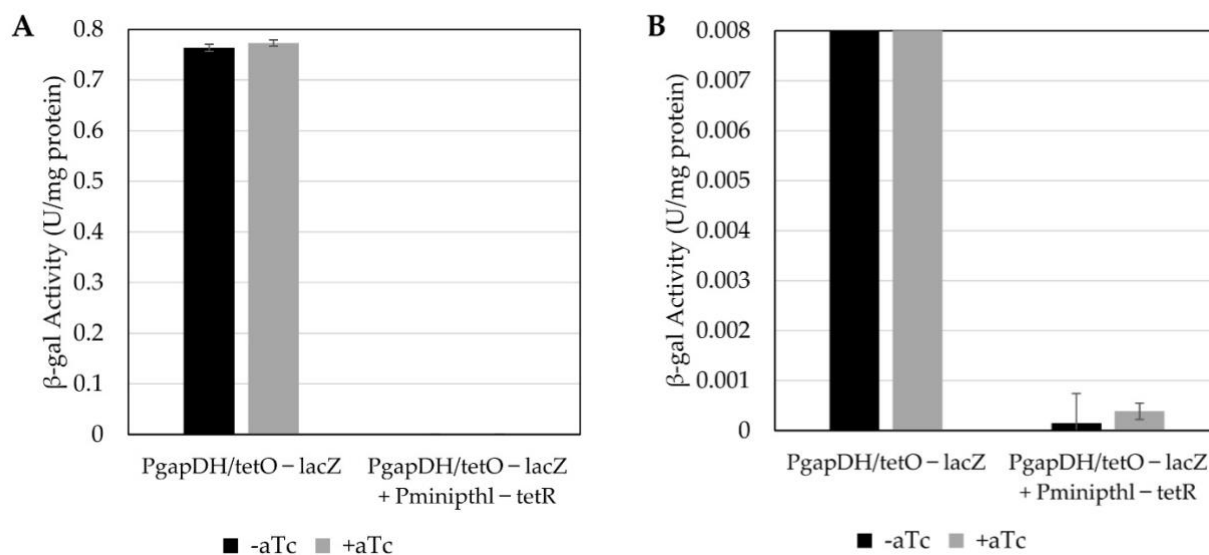

**Figure S2.** The activity of  $\beta$ -gal associated with different aTc plasmid constructs in *H. modesticaldum* with and without aTc inducer (200  $\mu$ g L<sup>-1</sup>). The constructs include P<sub>gapDH/tetO</sub> controlling *lacZ* (left), and a second construct including the *tetR* repressor controlled by P<sub>minipthl</sub> (right). Data represent the average rate of biological and technical triplicate; error bars represent the average standard deviation of each set of biological replicates. The ordinate scale is expanded 100-fold in plot B in order to see the activity of cells harboring the second construct.

## References

1. Olson, D.G.; Maloney, M.; Lanahan, A.A.; Hon, S.; Hauser, L.J.; Lynd, L.R. Identifying Promoters for Gene Expression in *Clostridium Thermocellum*. *Metab. Eng. Commun.* **2015**, *2*, 23–29, doi:10.1016/j.meten.2015.03.002.
2. Nariya, H.; Miyata, S.; Kuwahara, T.; Okabe, A. Development and Characterization of a Xylose-Inducible Gene Expression System for *Clostridium Perfringens* †. **2011**, *77*, 8439–8441, doi:10.1128/AEM.05668-11.
3. Heap, J.T.; Pennington, O.J.; Cartman, S.T.; Minton, N.P. A Modular System for Clostridium Shuttle Plasmids. *J. Microbiol. Methods* **2009**, *78*, 79–85, doi:10.1016/j.mimet.2009.05.004.
